# Supplementary material for: Increased aerosol scattering drives recent monsoon rainfall decrease over northern India
Source: Research Square preprint supplement (doi:10.21203/rs.3.rs-1976879/v1), 2022-09-14
Supplement: Supplementary file 1 [file a021959eff40537b3bef7760.docx]

**Increased aerosol scattering drives recent monsoon rainfall decrease over northern India**

Tong Ying1,2, Jing Li1,2*, Zhongjing Jiang1,2, Guanyu Liu1,2, Zhenyu Zhang1,2, Lu Zhang1,2, Yueming Dong1,2

1 Department of Atmospheric and Oceanic Sciences, School of Physics, Peking University, Beijing, 100871, P. R. China

2 Laboratory for Climate and Ocean-Atmosphere Studies, Department of Atmospheric and Oceanic Sciences, School of Physics, Peking University, Beijing, 100871, P. R. China

*E-mail: [jing-li@pku.edu.cn](mailto:jing-li@pku.edu.cn)

**Supplementary Information**

**Table S1 Experiment design of CAM4 simulations**

| **Experiment** | **Total mass of aerosols** | **Aerosol composition** |
| --- | --- | --- |
| aer_control_1980s | 1980s level | 1980s level |
| aer_control_2010s | 2010s level | 2010s level |
| aer_frac_2010s | 1980s level | 2010s level |
| aer_frac_1980s | 2010s level | 1980s level |

**Table S2 List of CMIP6 models, experiments and the number of ensemble members analyzed in this study50-62**

| **Model** | **AMIP** | **historical** | **hist-GHG** | **hist-aer** | **Reference** |
| --- | --- | --- | --- | --- | --- |
| **ACCESS-ESM1-5** | 3 | 20 | 3 | 3 | Ziehn et al., 2019 |
| **BCC-CSM2-MR** | 3 | 3 | 3 | 3 | Wu et al., 2018 |
| **CESM2** | 10 | 11 | 3 | 2 | Danabasoglu, 2019 |
| **CNRM-CM6-1** | 1 | 30 | 10 | 10 | Vordoire, 2018 |
| **CanESM5** | 7 | 65 | 50 | 30 | Swart et al., 2019 |
| **FGOALS-g3** | 5 | 6 | 3 | 3 | Li, 2019 |
| **GFDL-ESM4** | 1 | 3 | 1 | 1 | Krasting et al., 2018 |
| **GISS-E2-1-G** | 20 | 46 | 10 | 10 | NASA/GISS, 2018 |
| **HadGEM3-GC31-LL** | 5 | 4 | 4 | 4 | Ridley et al, 2019 |
| **IPSL-CM6A-LR** | 21 | 32 | 10 | 10 | Boucher et al., 2018 |
| **MIROC6** | 10 | 50 | 3 | 3 | Tatebe & Watanabe, 2018 |
| **MRI-ESM2-0** | 3 | 6 | 5 | 5 | Yukimoto et al., 2019 |
| **NorESM2-LM** | 1 | 3 | 3 | 3 | Seland et al., 2019 |


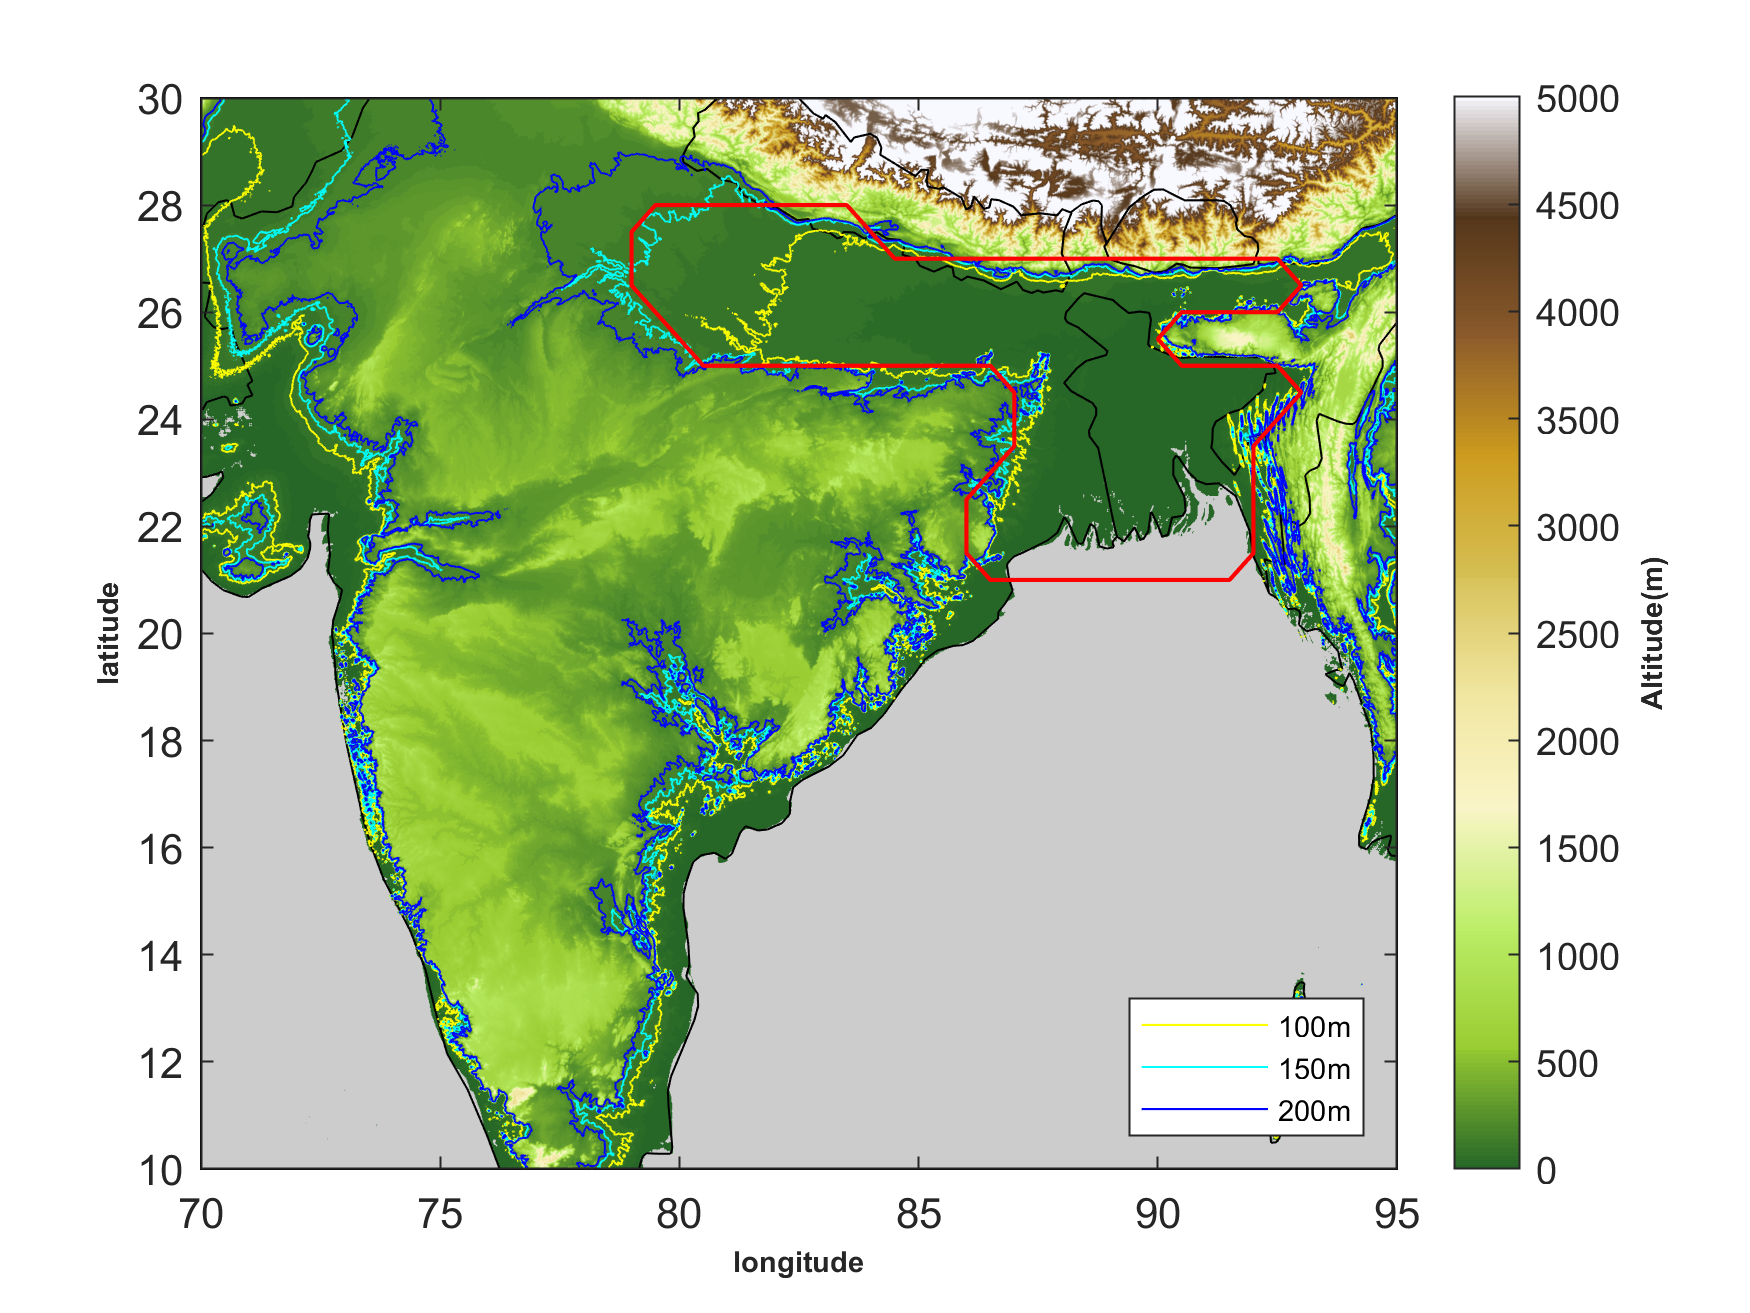


**Figure S1 Topography of South Asia and definition of the Gangetic region.** The yellow, cyan and blue line represent the contour of 100m, 150m and 200m, respectively. The red line represents the region of the Gangetic Plain.


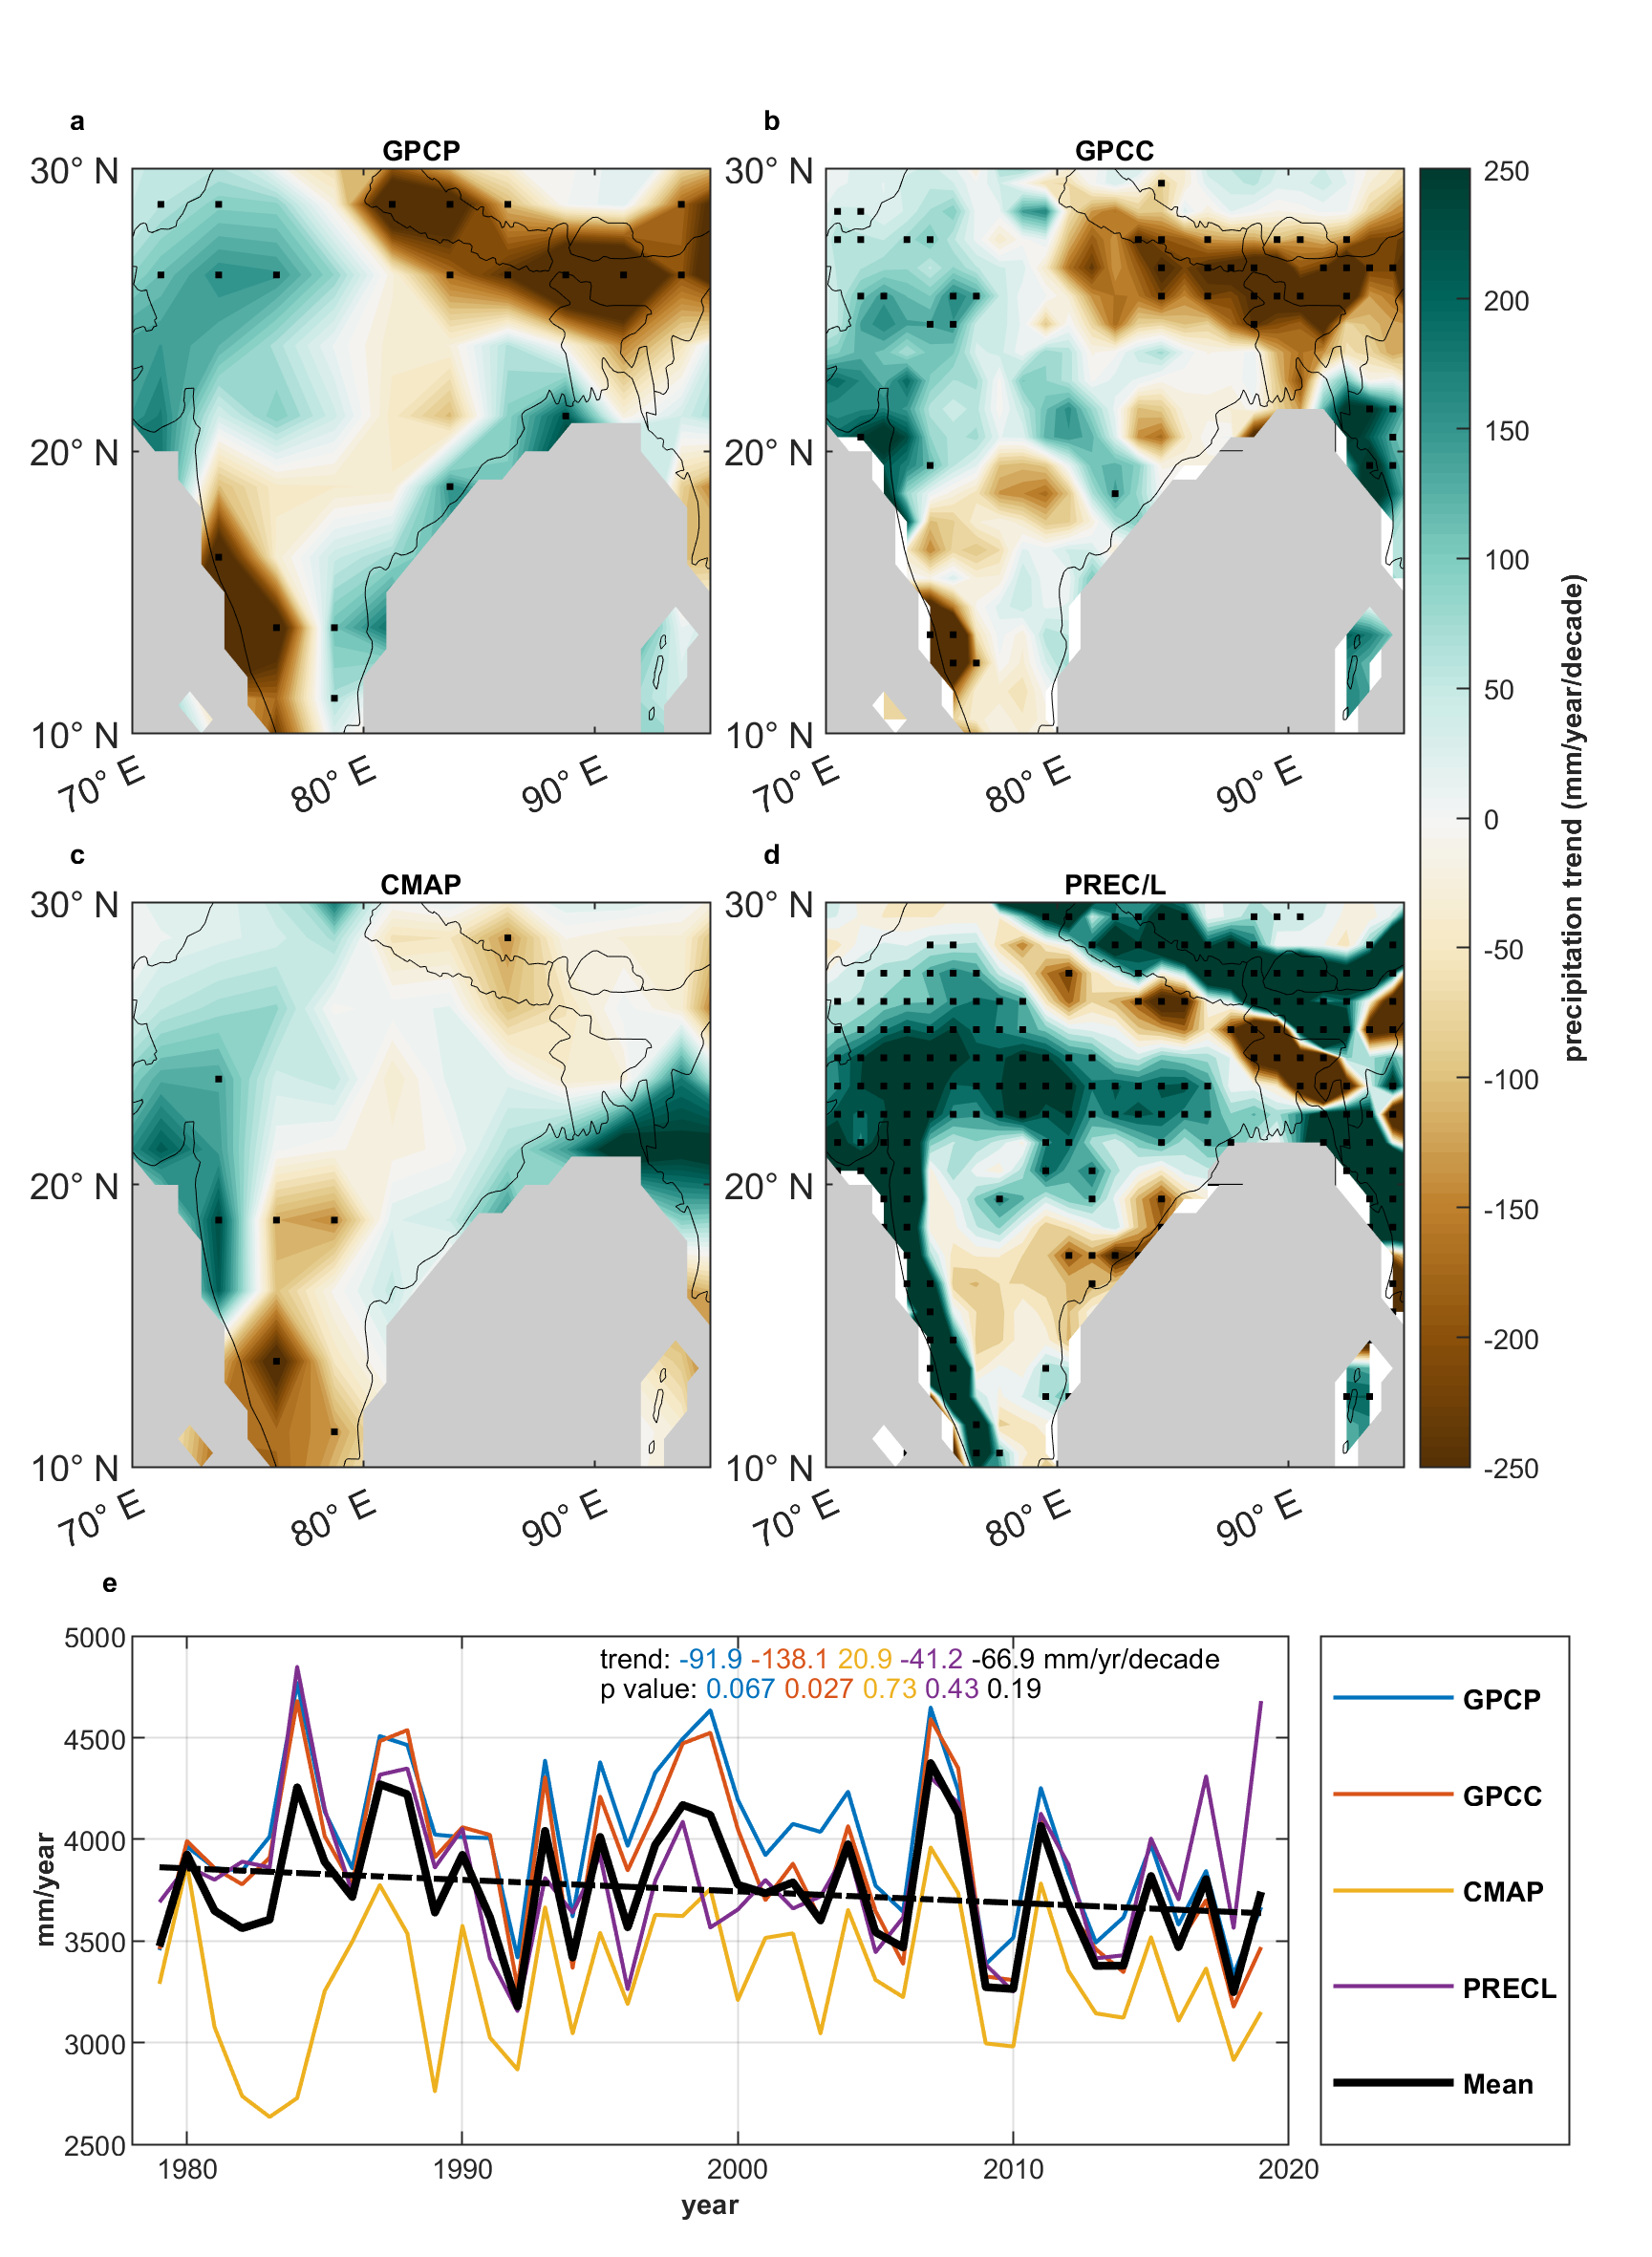


**Figure S2 Observed JJAS precipitation trends and time series from 1979 to 2019 in South Asia. a, b, c, d** precipitation trend maps from GPCP, GPCC, CMAP and PREC/L precipitation datasets, respectively. Trends are calculated by Sen’s slope, and grid boxes with black dots pass the Mann-Kendall test at 95% confidence level. **e,** time series of regional mean JJAS precipitation from observation datasets. The region is shown as the red contour in Fig. S1. The black dotted line represents the linear regression of the mean time series. The linear trends and the p values are calculated by Sen’s slope.

**
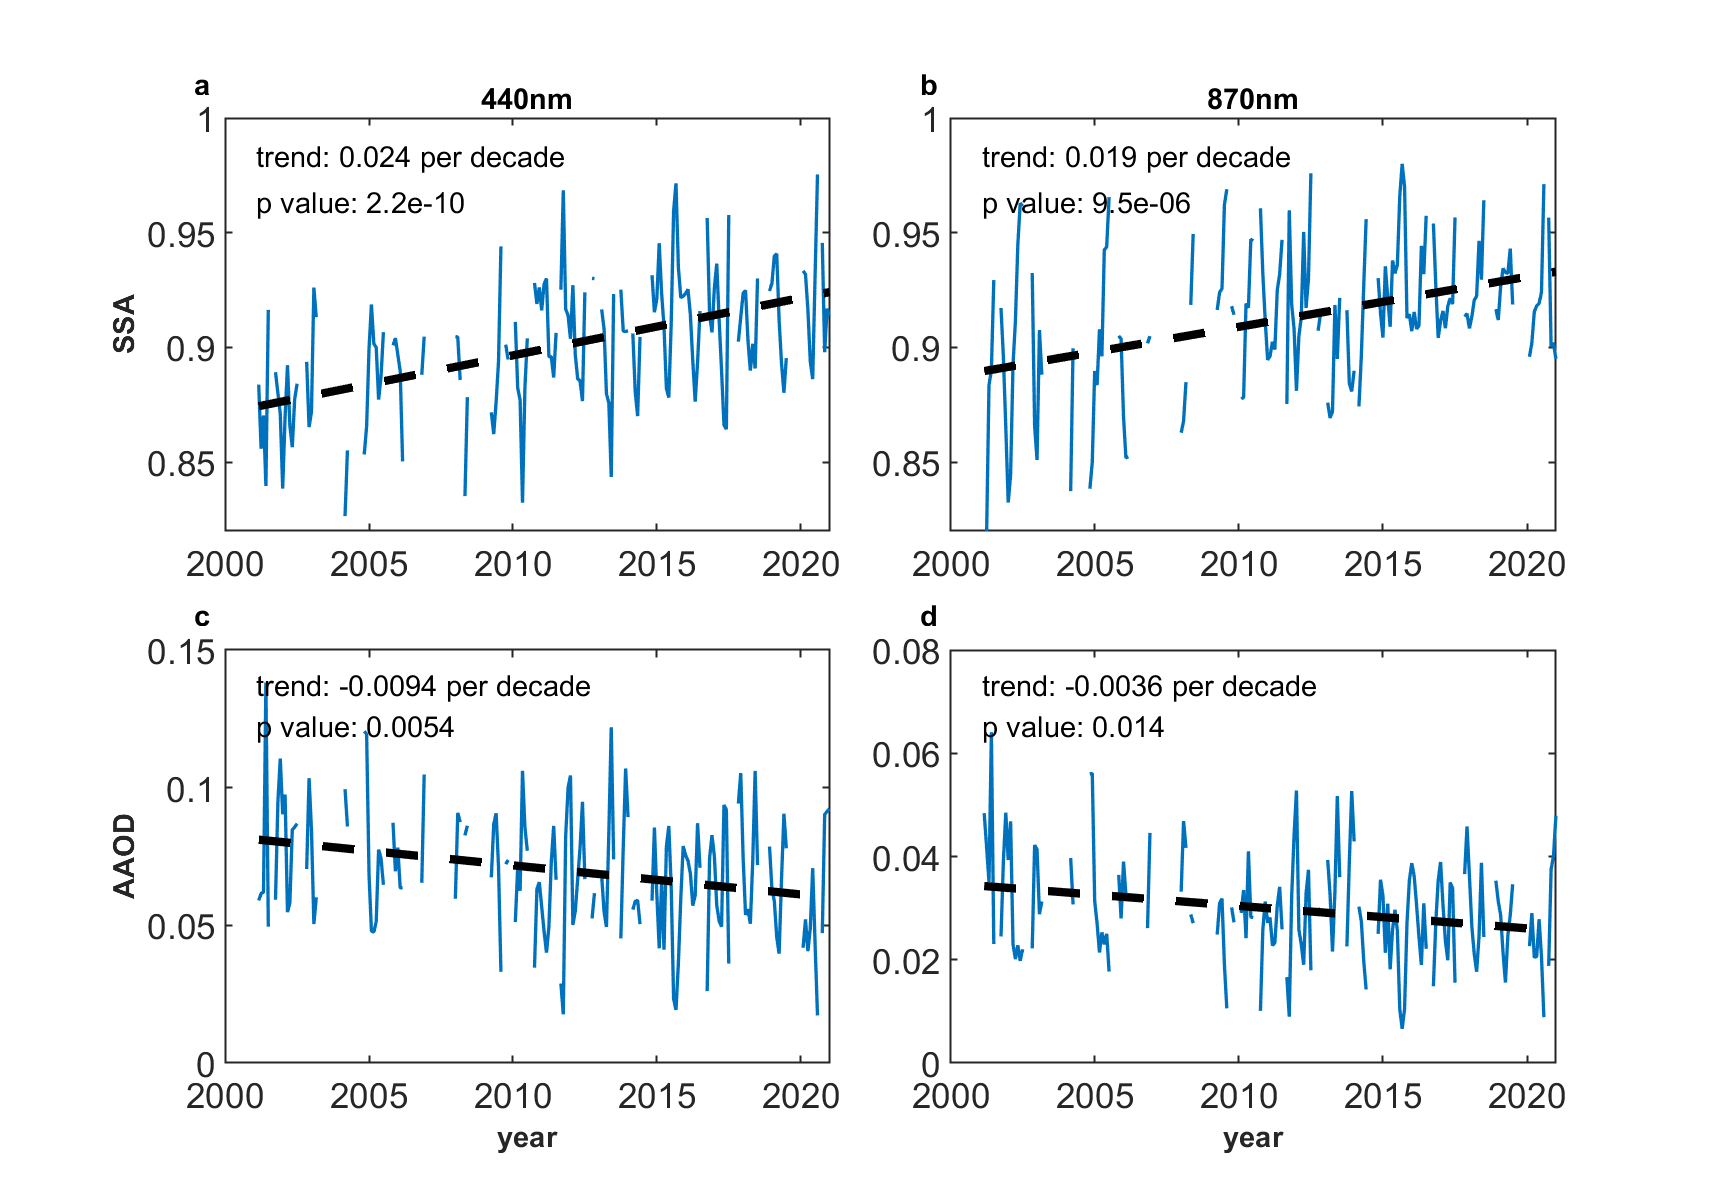
**

**Figure S3 Observed aerosol optical properties at Kanpur station in northern India. a,** single scattering albedo at 440nm obtained from AERONET level 1.5 monthly product. **c,** absorbing aerosol optical depth at 440nm obtained from AERONET level 1.5 monthly product. **b, d,** similar to **a, c,** but at 870nm. The black dotted lines represent the results of linear regression, and the trends and p values are calculated by Sen’s Slope from 2001 to 2020.

**
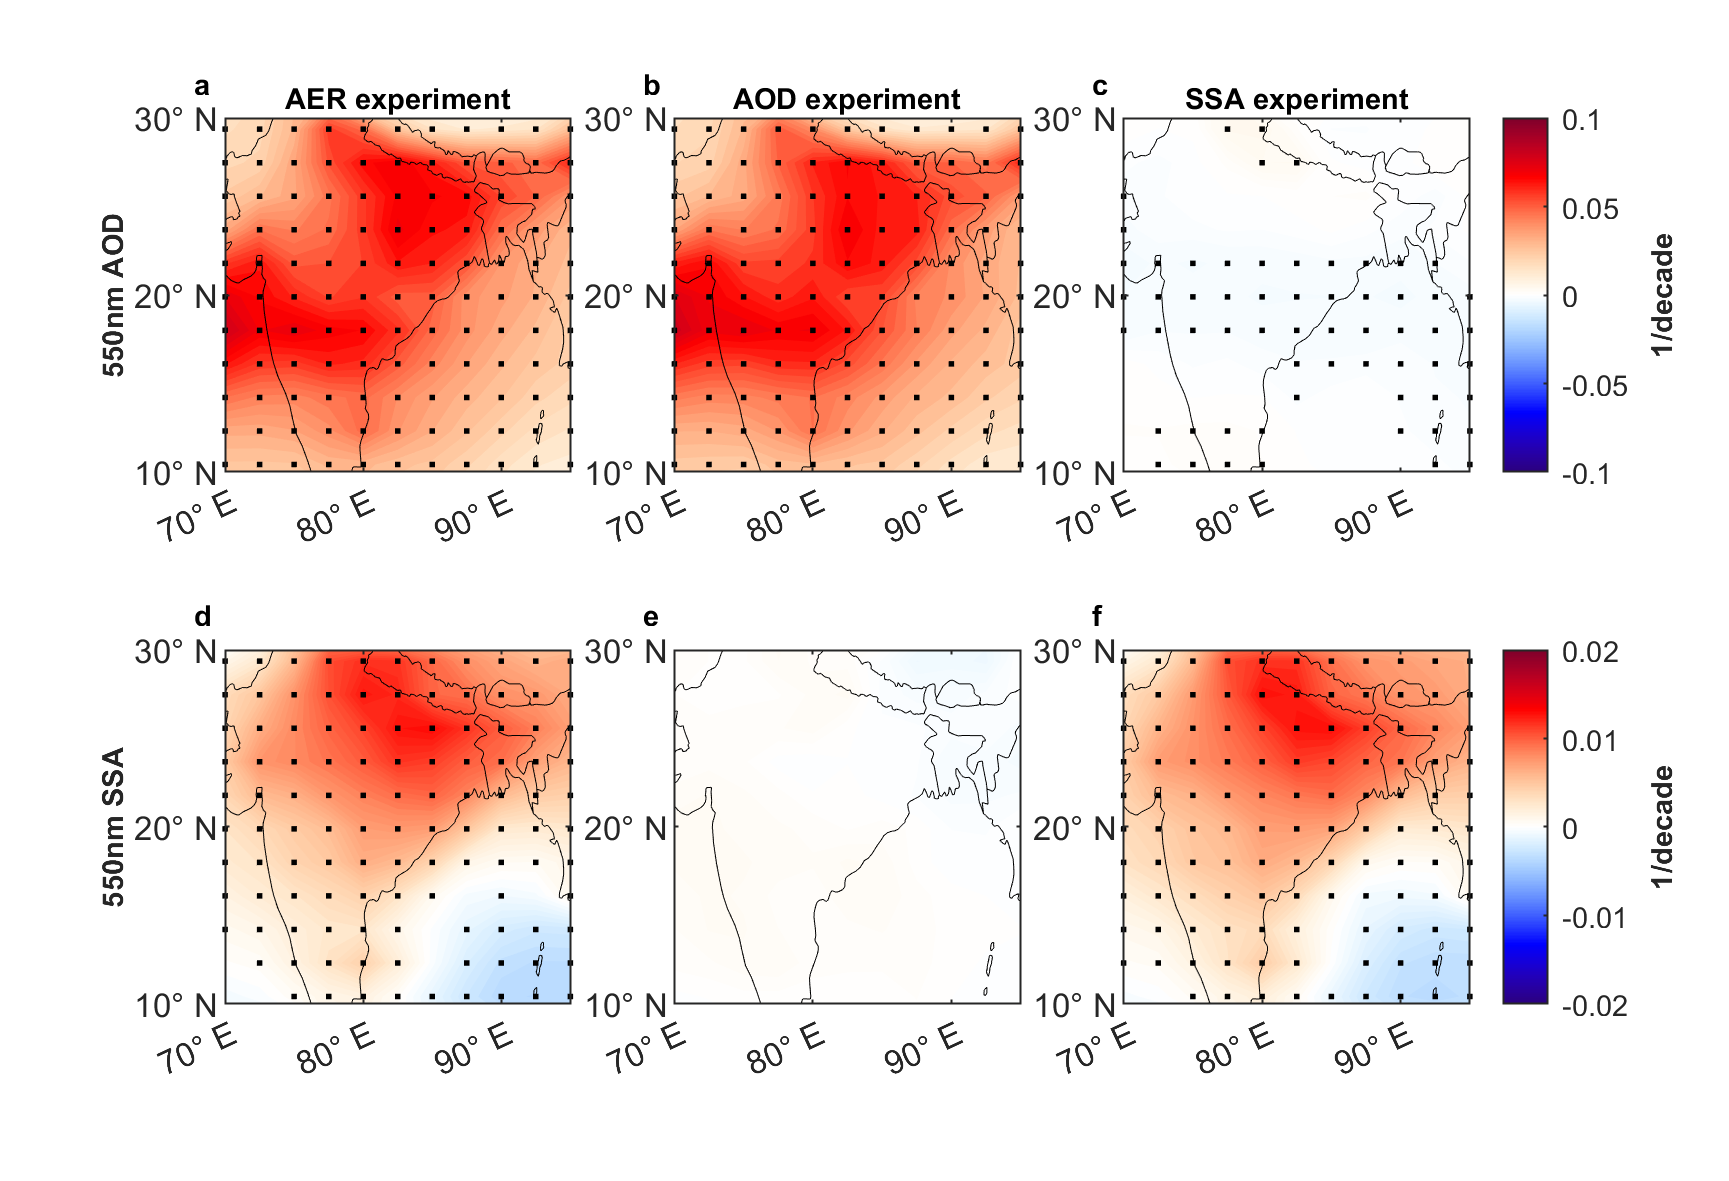
**

**Figure S4 AOD and SSA change of CAM4 experiments. a, d,** AOD and SSA change induced by aerosol changes from 1980s to 2010s level. **b, e,** similar to **a, d,** but the aerosol total amount changed from 1980s to 2010s level while the aerosol composition controlled at 1980s level. **c, f,** similar to **a, d,** but the aerosol total amount controlled at 1980s level while the aerosol composition changed from 1980s to 2010s level. The units of changes are converted into trends assuming the time period is 30 years. Grid boxes with black dots pass the Student’s t-test at 95% confidence level.

**
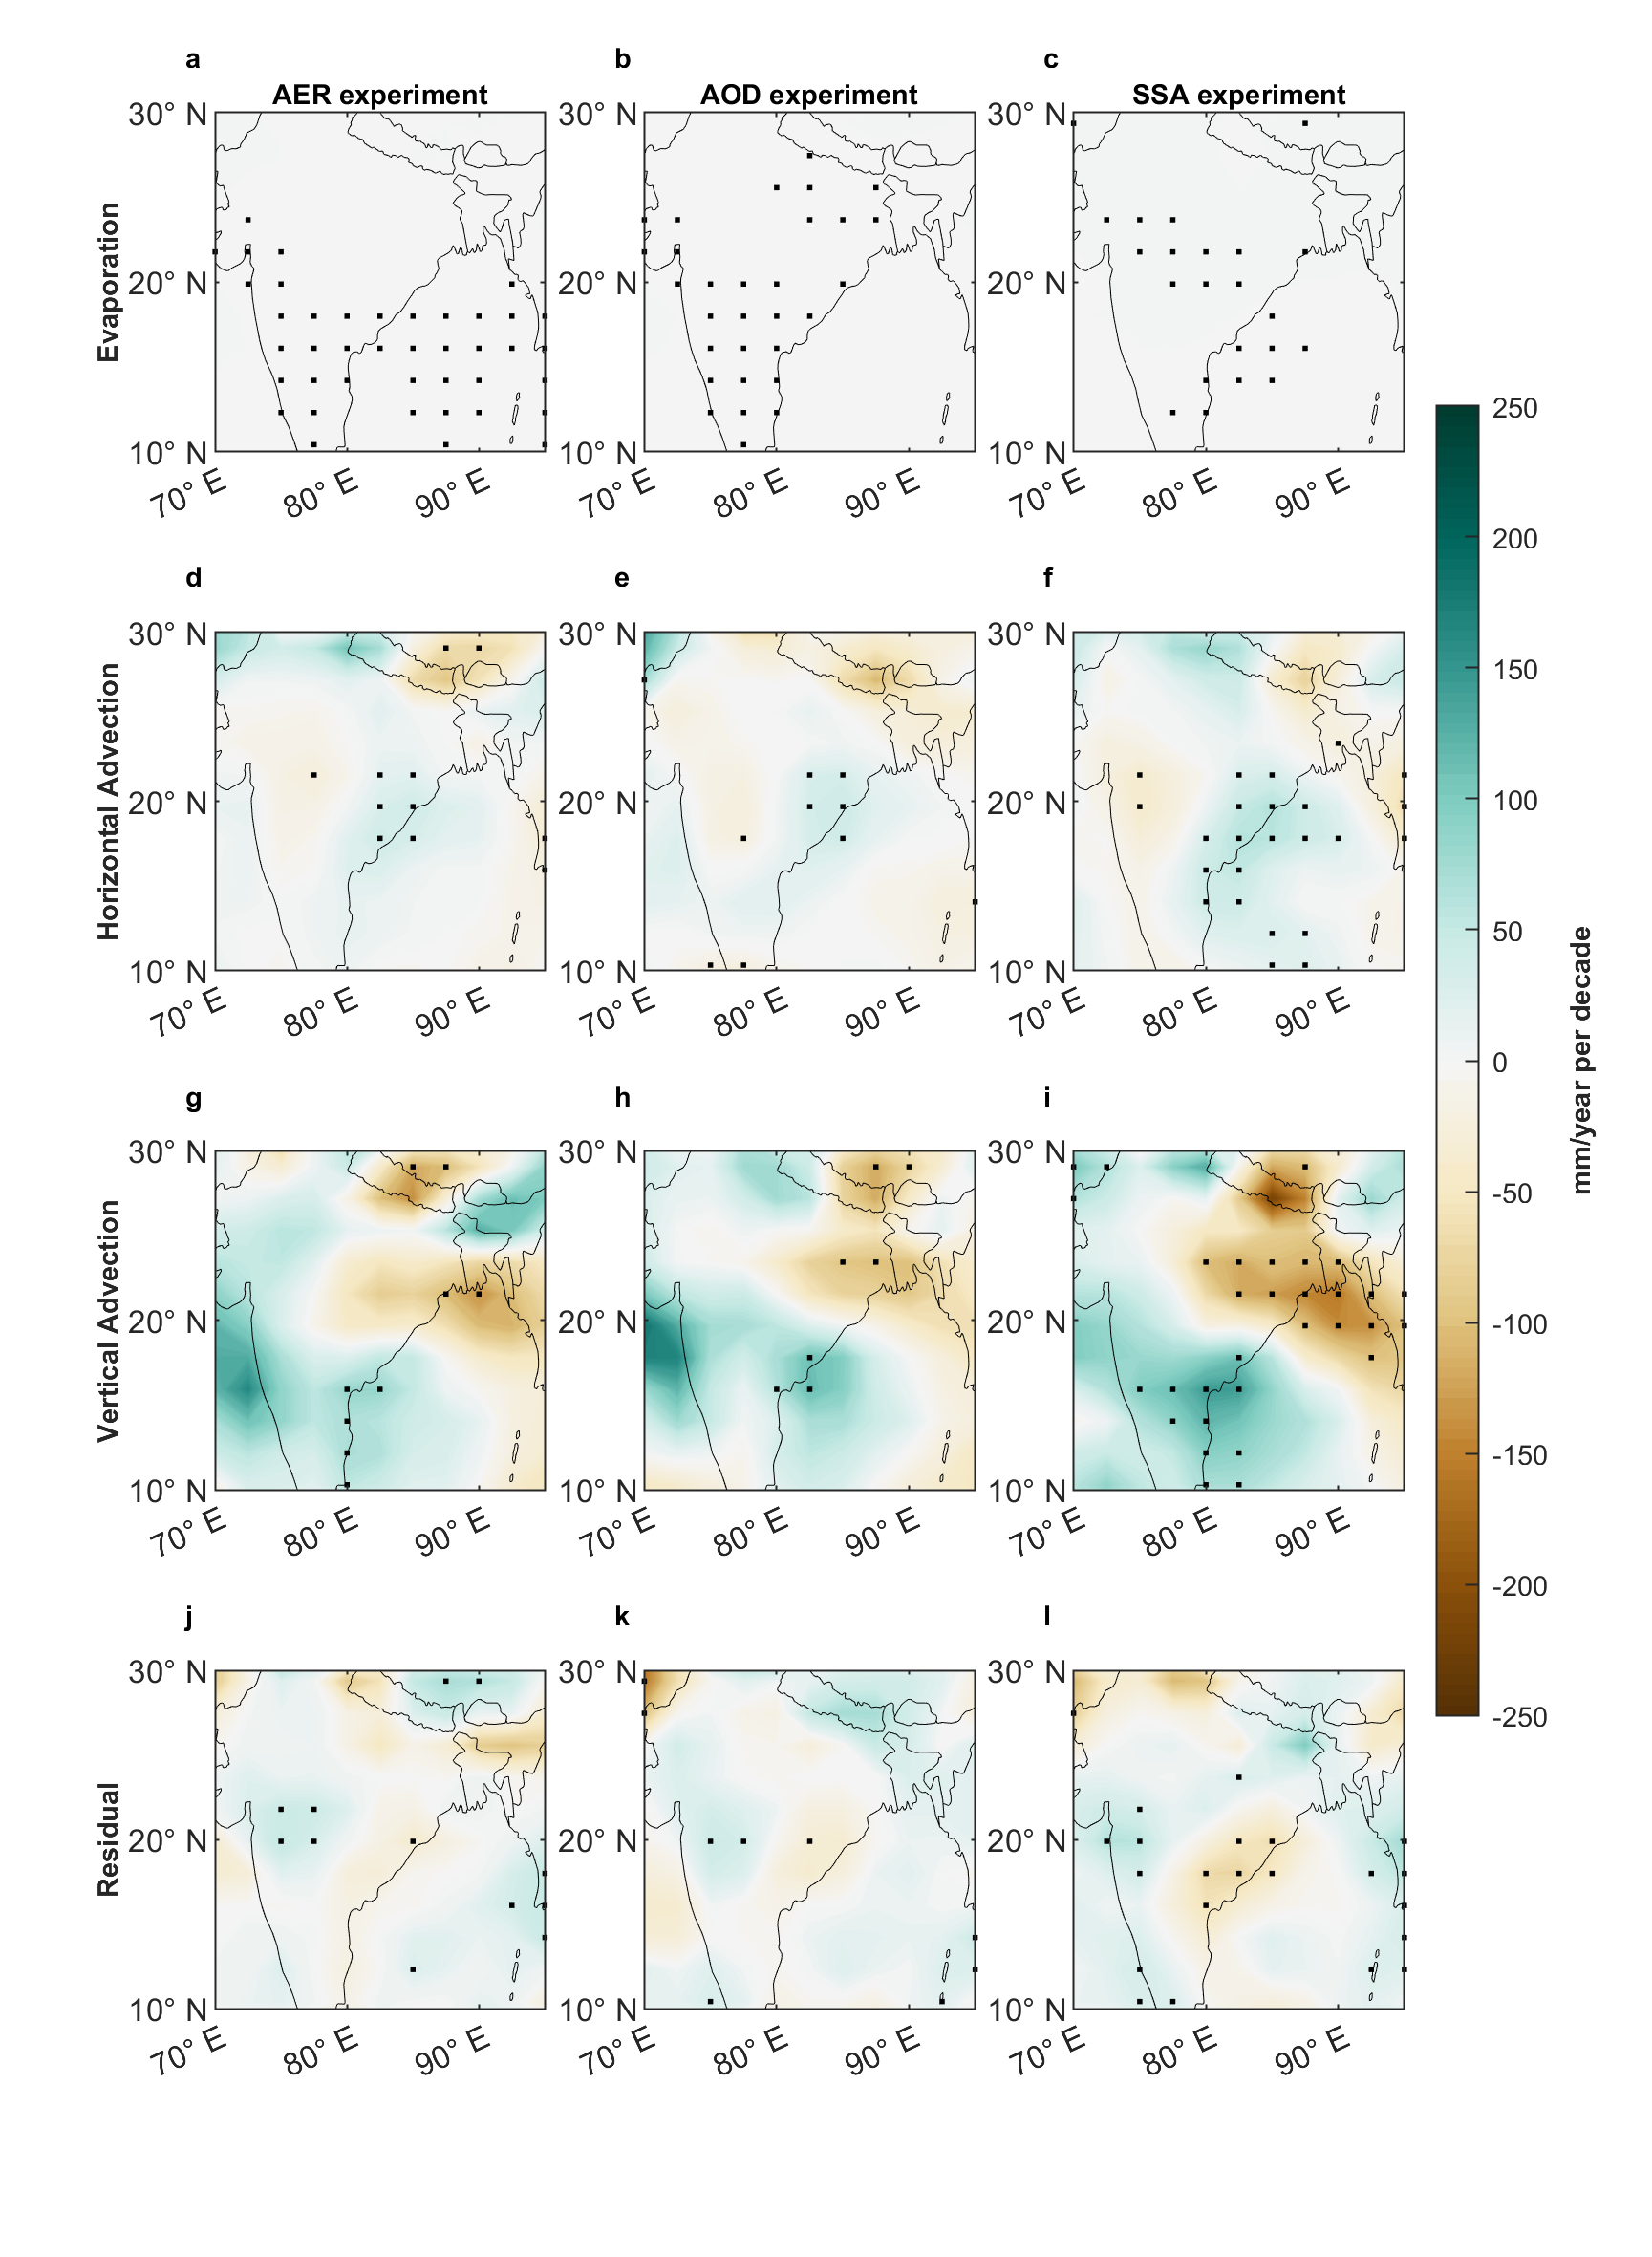
**

**Figure S5 Changes of moisture budget terms of CAM4 experiments. a, d, g, j,** evaporation, horizontal moisture advection, vertical moisture advection and residual changes due to aerosol change from 1980s to 2010s level. **b, e, h, k,** similar to **a, d, g, j,** but for changes due to increased AOD. **c, f, i, l,** similar to **a, d, g, j,** but for changes due to SSA increase. Grid boxes with black dots pass the Student’s t-test at 90% confidence level.


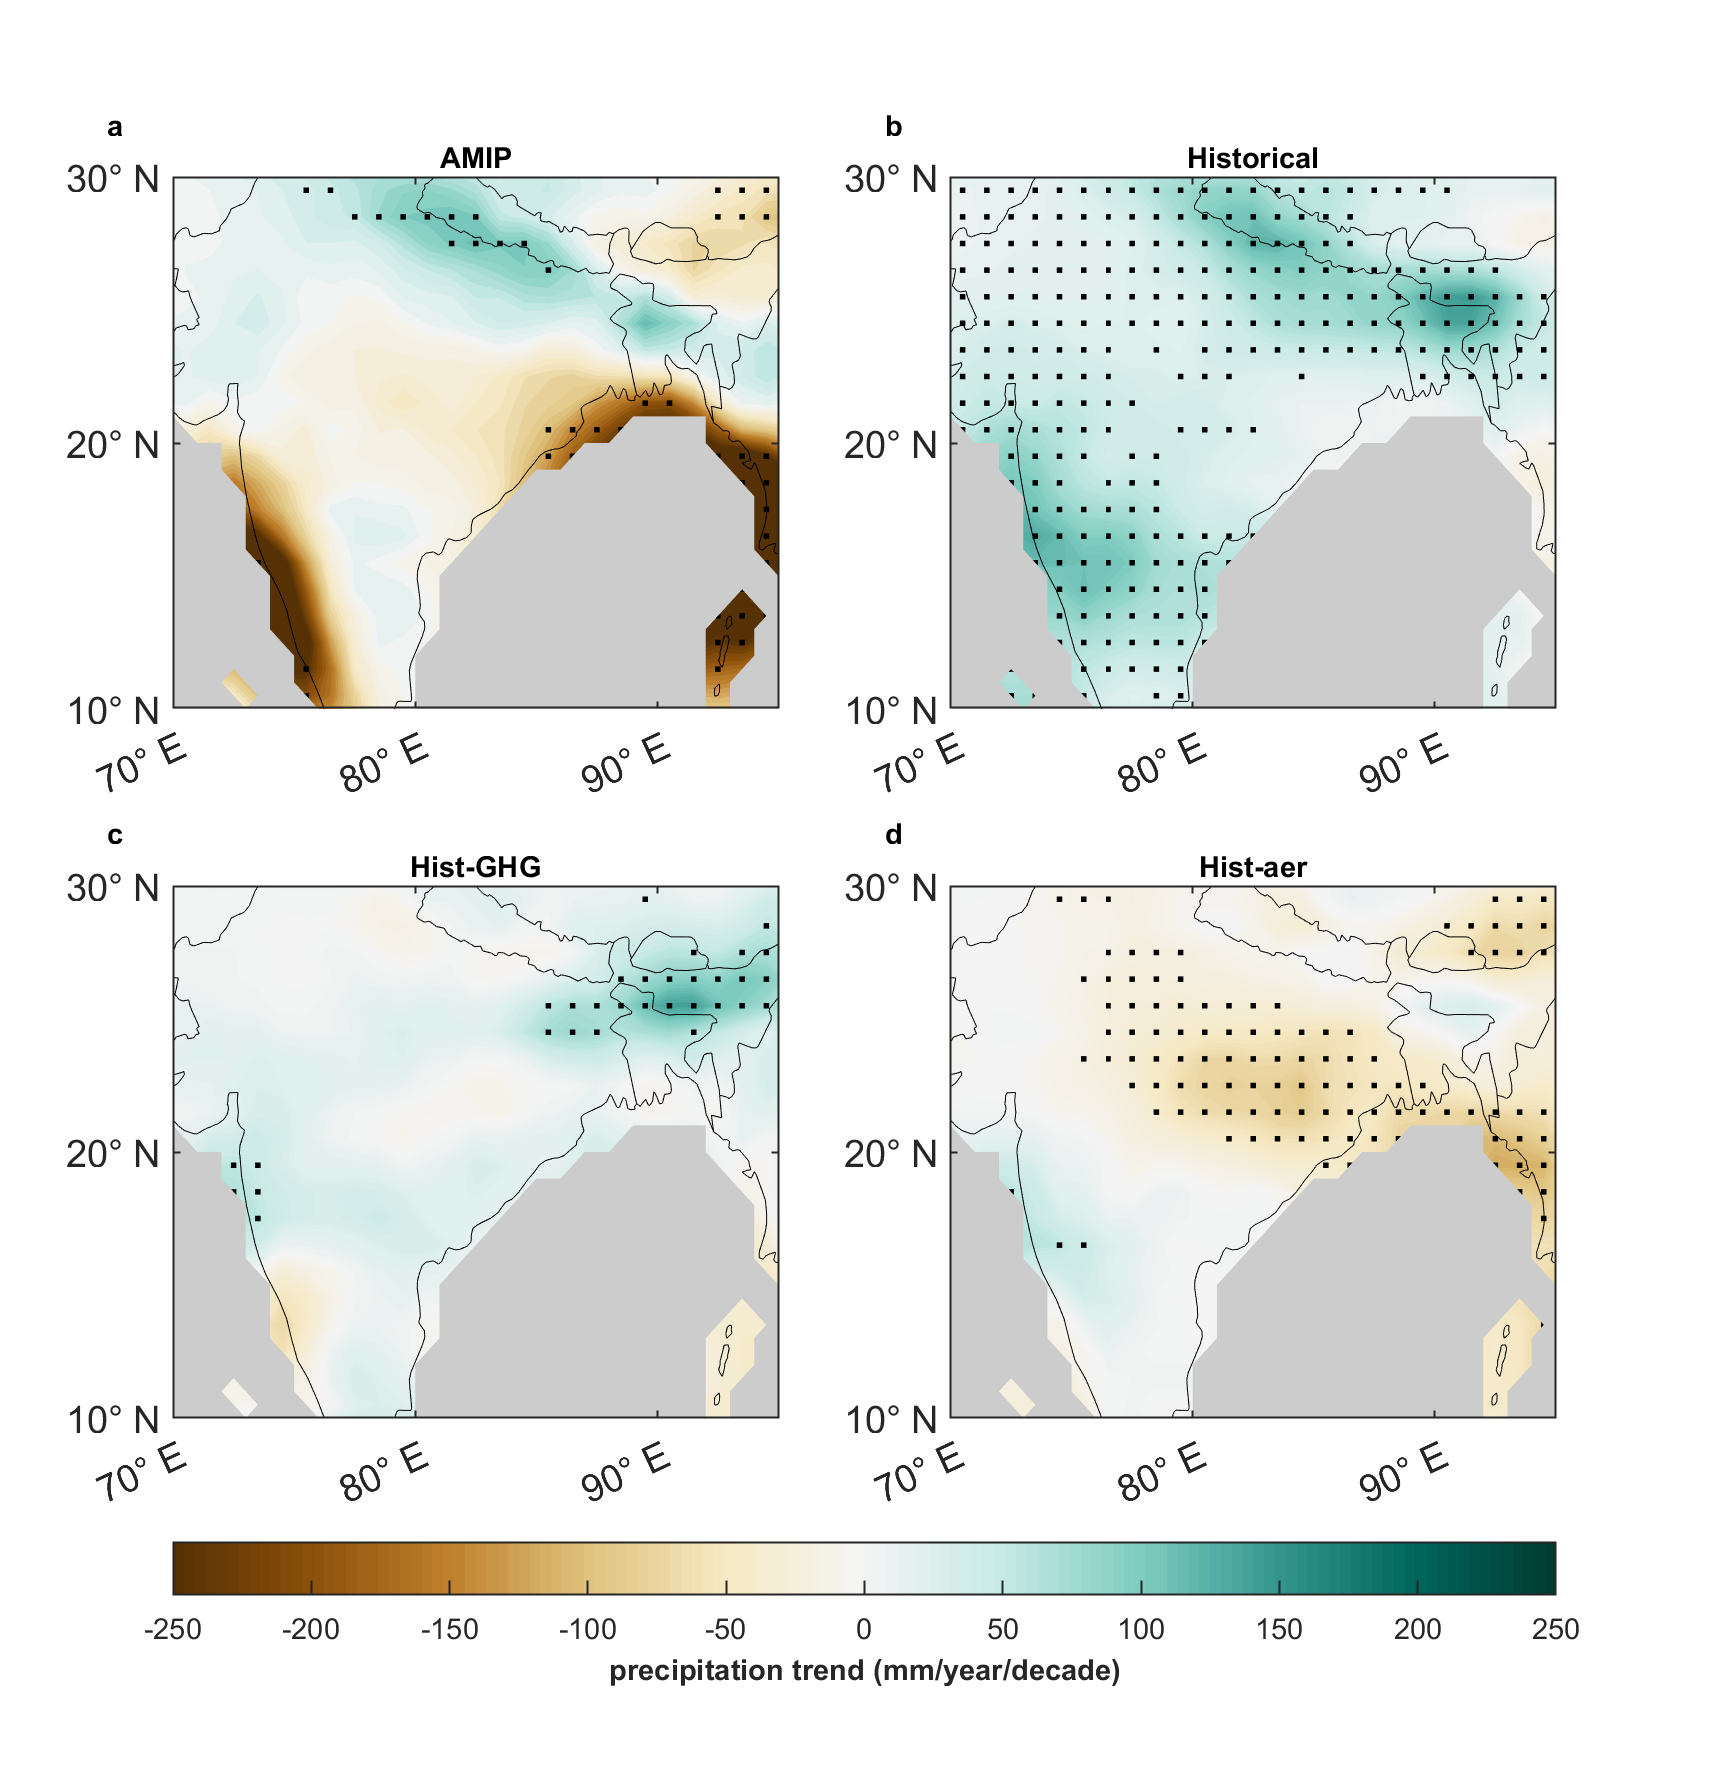


**Figure S6 Comparison of summer monsoon precipitation trends of CMIP6 multi-model-mean simulations from 1980 to 2014. a, b, c, & d,** precipitation trend from AMIP, historical, hist-GHG and hist-aer simulations, respectively. Linear trends are calculated with Sen’s slope. Grid boxes with black dots pass the Mann-Kendall test at 95% confidence level.

**Reference**

1. Ziehn, T., Chamberlain, M., Lenton, A., Law, R., Bodman, R., Dix, M., Wang, Y., Dobrohotoff, P., Srbinovsky, J., Stevens, L., Vohralik, P., Mackallah, C., Sullivan, A., O’Farrel, S., Druken, K. CSIRO ACCESS-ESM1.5 model output prepared for CMIP6 CMIP historical. Version 20191115. *Earth System Grid Federation* (2019).
2. Wu, T., Chu, M., Dong, M., Fang, Y., Jie, W., Li, J., Li, W., Liu, Q., Shi, X., Xin, X., Yan, J., Zhang, F., Zhang, J., Zhang, L., Zhang, Y. BCC BCC-CSM2MR model output prepared for CMIP6 CMIP historical. Version 20181126. *Earth System Grid Federation* (2018).
3. Danabasoglu, G. NCAR CESM2 model output prepared for CMIP6 CMIP historical. Version 20190401. *Earth System Grid Federation* (2019).
4. Vordoire, A. CMIP6 simulations of the CNRM-CERFACS based on CNRM-CM6-1 model for CMIP experiment historical. Version 20180917. *Earth System Grid Federation* (2018).
5. Swart, N. C., Cole, J. N. S., Kharin, V. V., Lazare, M., Scinocca, J. F., Gillett, N. P., Anstey, J., Arora, V., Christian, J. R., Jiao, Y., Lee, W. G., Majaess, F., Saenko, O. A., Seiler, C., Seinen, C., Shao, A., Solheim, L., von Salzen, K., Yang, D., Winter, B., Sigmond, M. CCCma CanESM5 model output prepared for CMIP6 CMIP historical. Version 20190429. *Earth System Grid Federation* (2019).
6. Li, L. CAS FGOALS-g3 model output prepared for CMIP6 CMIP historical. Version 20190818. *Earth System Grid Federation* (2019).
7. Krasting, J. P., John, J. G., Blanton, C., McHugh, C., Nikonov, S., Radhakrishnan, A., Rand, K., Zadeh, N. T., Balaji, V., Durachta, J., Dupuis, C., Menzel, R., Robinson, T., Underwood, S., Vahlenkamp, H., Dunne, K. A., Gauthier, P. P. G., Ginoux, P., Griffies, S. M., Hallberg, R., Harrison, M., Hurlin, W., Malyshev, S., Naik, V., Paulot, F., Paynter, D. J., Ploshay, J., Reichl, B. G., Schwarzkopf, D. M., Seman, C. J., Silvers, L., Wyman, B., Zeng, Y., Adcroft, A., Dunne, J. P., Dussin, R., Guo, H., He, J., Held, I. M., Horowitz, L. W., Lin, P., Milly, P. C. D., Shevliakova, E., Stock, C., Winton, M., Wittenberg, A. T., Xie, Y., Zhao, M. NOAA-GFDL GFDL-ESM4 model output prepared for CMIP6 CMIP historical. Version 20190726. *Earth System Grid Federation* (2018).
8. NASA Goddard Institute for Space Studies (NASA/GISS). NASA-GISS GISS-E2.1G model output prepared for CMIP6 CMIP historical. Version 20190908. *Earth System Grid Federation* (2018).
9. Ridley, J., Menary, M., Kuhlbrodt, T., Andrews, M. & Andrews, T. MOHC HadGEM3-GC31-LL model output prepared for CMIP6 CMIP historical. Version 20190624. *Earth System Grid Federation* (2019).
10. Boucher, O., Denvil, S., Levavasseur, G., Cozic, A., Caubel, A., Foujols, M.-A., Meurdesoif, Y., Cadule, P., Devilliers, M., Ghattas, J., Lebas, N., Lurton, T., Mellul, L., Musat, I., Mignot, J. & Cheruy, F. IPSL IPSL-CM6A-LR model output prepared for CMIP6 CMIP historical. Version 20180803. *Earth System Grid Federation* (2018).
11. Tatebe, H. & Watanabe, M. MIROC MIROC6 model output prepared for CMIP6 CMIP historical. Version 20181212. *Earth System Grid Federation* (2018).
12. Yukimoto, S., Koshiro, T., Kawai, H., Oshima, N., Yoshida, K., Urakawa, S., Tsujino, H., Deushi, M., Tanaka, T., Hosaka, M., Yoshimura, H., Shindo, E., Mizuta, R., Ishii, M., Obata, A. & Adachi, Y. MRI MRI-ESM2.0 model output prepared for CMIP6 CMIP historical. Version 20190222. *Earth System Grid Federation* (2019).
13. Seland, Ø., Bentsen, M., Oliviè, D. J. L., Toniazzo, T., Gjermundsen, A., Graff, L. S., Debernard, J. B., Gupta, A. K., He, Y., Kirkevåg, A., Schwinger, J., Tjiputra, J., Aas, K. S., Bethke, I., Fan, Y., Griesfeller, J., Grini, A., Guo, C., Ilicak, M., Karset, I. H. H., Landgren, O. A., Liakka, J., Moseid, K. O., Nummelin, A., Spensberger, C., Tang, H., Zhang, Z., Heinze, C., Iversen, T. & Schulz, M. NCC NorESM2-LM model output prepared for CMIP6 CMIP historical. Version 20190920. *Earth System Grid Federation* (2019).
